# Supplementary material for: Increased chromosomal mobility after DNA damage is controlled by interactions between the recombination machinery and the checkpoint
Source: PubMed Central journal article supplement — Genes Dev. 2018 Sep 1;32(17-18):1242–51. doi: 10.1101/gad.317966.118 (PMC6120718; doi:10.1101/gad.317966.118), 2018-09-01

# Distribution of confinement radii

Smith\_FigS3

Confinement Radii (Rc) for S-phase cells grouped by experiment median

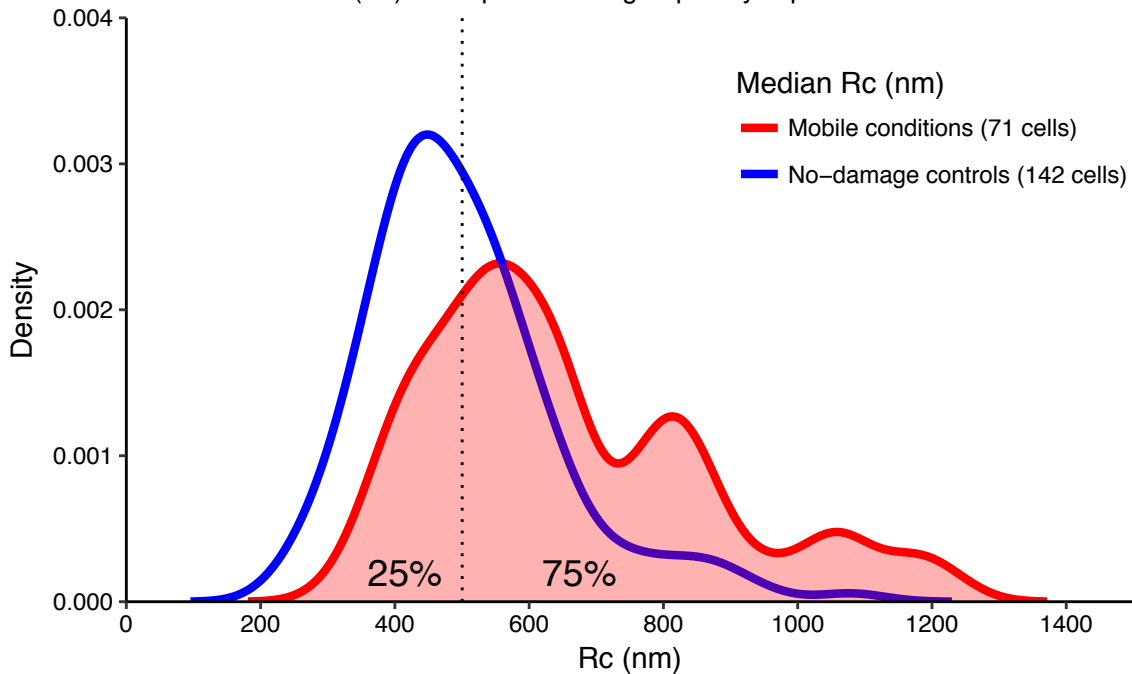

Supplement: supp_32.17-18.1242_Supplemental_Fig_S3_RGB.pdf [file supp_32.17-18.1242_Supplemental_Fig_S3_RGB.pdf]
