# Supplementary material for: Increased chromosomal mobility after DNA damage is controlled by interactions between the recombination machinery and the checkpoint
Source: PubMed Central journal article supplement — Genes Dev. 2018 Sep 1;32(17-18):1242–51. doi: 10.1101/gad.317966.118 (PMC6120718; doi:10.1101/gad.317966.118), 2018-09-01
Supplement: supp_32.17-18.1242_Supplemental_Table_S2.pdf [file supp_32.17-18.1242_Supplemental_Table_S2.pdf]

**Table S2: Summary of Results and Statistics**

| Fig. | Experiment                                                           | Cells | Rc (nm)      | $\Delta Rc$ | 95% CI [low, high] | p-value           |
|------|----------------------------------------------------------------------|-------|--------------|-------------|--------------------|-------------------|
| 1B   | WT                                                                   | 14    | 480 $\pm$ 30 | 120         | [30, 220]          | 0.01*             |
|      | WT +40Gy                                                             | 12    | 580 $\pm$ 40 |             |                    |                   |
| 1C   | <i>rad51</i> $\Delta$                                                | 10    | 500 $\pm$ 30 | 10          | [-110, 170]        | 0.9               |
|      | <i>rad51</i> $\Delta$ +40Gy                                          | 14    | 500 $\pm$ 50 |             |                    |                   |
| 2B   | <i>rad52</i> $\Delta$                                                | 23    | 480 $\pm$ 30 | 40          | [-20, 100]         | 0.2               |
|      | <i>rad52</i> $\Delta$ +40Gy                                          | 26    | 490 $\pm$ 20 |             |                    |                   |
| 2C   | <i>rad51</i> $\Delta$ <i>rad52</i> $\Delta$                          | 20    | 580 $\pm$ 50 | -10         | [-130, 110]        | 0.9               |
|      | <i>rad51</i> $\Delta$ <i>rad52</i> $\Delta$ +40Gy                    | 28    | 600 $\pm$ 40 |             |                    |                   |
| 3A   | WT +Caffeine                                                         | 11    | 500 $\pm$ 40 | -80         | [-260, 80]         | 0.2               |
|      | WT +40Gy +Caffeine                                                   | 6     | 450 $\pm$ 50 |             |                    |                   |
| 3B   | -LacOx256 +Gal                                                       | 12    | 480 $\pm$ 50 | 230         | [50, 520]          | 0.001***          |
|      | +LacOx256 +Gal                                                       | 11    | 640 $\pm$ 90 |             |                    |                   |
| 3B   | +LacOx256                                                            | 10    | 460 $\pm$ 40 | 290         | [50, 560]          | 0.008**           |
|      | +LacOx256 +Gal                                                       | 11    | 640 $\pm$ 90 |             |                    |                   |
| 3B   | +LacOx256 +Gal                                                       | 11    | 640 $\pm$ 90 | -330        | [-600, -120]       | 0.001**           |
|      | +LacOx256 +Gal +Caffeine                                             | 13    | 400 $\pm$ 20 |             |                    |                   |
| 3C   | <i>rad51</i> $\Delta$ <i>rad52</i> $\Delta$                          | 20    | 580 $\pm$ 50 | -170        | [-330, -40]        | 0.01*             |
|      | <i>rad51</i> $\Delta$ <i>rad52</i> $\Delta$ +Caffeine                | 16    | 410 $\pm$ 40 |             |                    |                   |
| 4A   | WT                                                                   | 14    | 480 $\pm$ 30 | 110         | [10, 260]          | 0.03*             |
|      | <i>rad51-II3A</i> +40Gy                                              | 16    | 580 $\pm$ 60 |             |                    |                   |
| 4A   | <i>rad51-II3A</i>                                                    | 15    | 510 $\pm$ 40 | 100         | [-20, 230]         | 0.09 <sup>†</sup> |
|      | <i>rad51-II3A</i> +40Gy                                              | 16    | 580 $\pm$ 60 |             |                    |                   |
| 4A   | WT                                                                   | 14    | 480 $\pm$ 30 | 20          | [-70, 140]         | 0.7               |
|      | <i>rad51-II3A</i>                                                    | 15    | 510 $\pm$ 40 |             |                    |                   |
| 4B   | <i>rad52</i> $\Delta$ <sub>409-412</sub>                             | 17    | 490 $\pm$ 40 | -30         | [-130, 90]         | 0.6               |
|      | <i>rad52</i> $\Delta$ <sub>409-412</sub> +40Gy                       | 32    | 490 $\pm$ 30 |             |                    |                   |
| 4C   | <i>rad51</i> $\Delta$ <i>rad52</i> $\Delta$ <sub>409-412</sub>       | 30    | 480 $\pm$ 30 | 30          | [-70, 130]         | 0.5               |
|      | <i>rad51</i> $\Delta$ <i>rad52</i> $\Delta$ <sub>409-412</sub> +40Gy | 26    | 510 $\pm$ 40 |             |                    |                   |
| S1A  | -LacOx256                                                            | 10    | 450 $\pm$ 30 | 10          | [-70, 140]         | 0.7               |
|      | -LacOx256 +Gal                                                       | 12    | 480 $\pm$ 50 |             |                    |                   |
| S1C  | <i>rad51-S192A</i>                                                   | 15    | 480 $\pm$ 40 | 30          | [-80, 120]         | 0.5               |
|      | <i>rad51-S192A</i> +40Gy                                             | 10    | 500 $\pm$ 40 |             |                    |                   |
| S1D  | <i>rad51-S192E</i>                                                   | 14    | 500 $\pm$ 40 | -40         | [-140, 60]         | 0.4               |
|      | <i>rad51-S192E</i> +40Gy                                             | 11    | 480 $\pm$ 50 |             |                    |                   |
